# Supplementary material for: Cytogenetic Evidence for Sex Chromosomes and Karyotype Evolution in Anguimorphan Lizards
Source: MDPI journal article supplement (doi:10.3390/cells10071612), 2021-06-28
Supplement: s1 [file s1]

# Cytogenetic Evidence for Sex Chromosomes and Karyotype Evolution in Aguiomorphan Lizards

Barbora Augstenová, Eleonora Pensabene, Lukáš Kratochvíl and Michail Rovatsos \*

Department of Ecology, Faculty of Science, Charles University, 12844 Prague, Czech Republic; augstenova.barbora@gmail.com (B.A.); pensabee@natur.cuni.cz (E.P.); kratoch1@natur.cuni.cz (L.K.)

\* Correspondence: mirovatsos@gmail.com

## Supplementary materials:

**Table S1.** Summary of studied species and number of examined individuals.

| Family         | Species                         | Male | Female | Unknown sex |
|----------------|---------------------------------|------|--------|-------------|
| Anguidae       | <i>Abronia campbelli</i>        | 1    | 0      | 0           |
| Anguidae       | <i>Abronia dippei</i>           | 1    | 1      | 0           |
| Anguidae       | <i>Abronia graminea</i>         | 1    | 0      | 0           |
| Anguidae       | <i>Abronia lythrochila</i>      | 2    | 2      | 0           |
| Anguidae       | <i>Abronia mixteca</i>          | 1    | 0      | 0           |
| Anguidae       | <i>Abronia smithi</i>           | 1    | 0      | 0           |
| Anguidae       | <i>Abronia teaniata</i>         | 1    | 0      | 0           |
| Anguidae       | <i>Barisia rudicolis</i>        | 1    | 1      | 0           |
| Anguidae       | <i>Celestus warreni</i>         | 1    | 1      | 0           |
| Anguidae       | <i>Gerhonotus liocephalus</i>   | 1    | 0      | 0           |
| Helodermatidae | <i>Heloderma exasperatum</i>    | 3    | 2      | 0           |
| Helodermatidae | <i>Heloderma horridum</i>       | 3    | 2      | 0           |
| Shinisauridae  | <i>Shinisaurus crocodilurus</i> | 1    | 1      | 2           |
| Varanidae      | <i>Varanus auffenbergi</i>      | 1    | 0      | 0           |
| Varanidae      | <i>Varanus cumingi</i>          | 1    | 2      | 0           |
| Varanidae      | <i>Varanus komaini</i>          | 1    | 1      | 0           |
| Varanidae      | <i>Varanus kordiensis</i>       | 0    | 1      | 0           |
| Varanidae      | <i>Varanus olivaceus</i>        | 3    | 2      | 0           |
| Varanidae      | <i>Varanus primordius</i>       | 1    | 0      | 1           |
| Varanidae      | <i>Varanus salvadori</i>        | 1    | 1      | 0           |
| Xenosauridae   | <i>Xenosaurus grandis</i>       | 1    | 0      | 0           |
| Xenosauridae   | <i>Xenosaurus platyceps</i>     | 0    | 0      | 2           |
| Xenosauridae   | <i>Xenosaurus rectocollaris</i> | 0    | 2      | 0           |

**Table S2.** Primers and results of the qPCR test for estimating the sex chromosome constitution in the triploid *Varanus primordius*.

| Gene name                               | Gene symbol   | Primer name | Forward primer         | Reverse primer         | triploid to male gene dose ratio |
|-----------------------------------------|---------------|-------------|------------------------|------------------------|----------------------------------|
| MDS1 and EVI1 complex locus             | <i>mecom</i>  | mecom_5     | AGGAGATTTTGTGAGGGCAAGA | GCTGTTGGAAAGGTAAGACCAG | 1.00                             |
| double-stranded RNA-specific editase B2 | <i>adarb2</i> | adarb2_1    | CTGCTGGGAATGCGACTGG    | GCCTTTCGGAGACTGTGGAG   | 0.97                             |
| glutamate receptor ionotropic, NMDA 3B  | <i>grin3b</i> | grin3b_1    | ATGGCGTAGCAGAGGTTGAG   | GTGGGTGGGCATCTTCGTG    | 0.71                             |
